# Supplementary material for: On the origin of the inverted singlet–triplet gap of the 5th generation light-emitting molecules
Source: Royal Society of Chemistry journal article supplement (doi:10.1039/d2cp02364d), 2022-01-01
Supplement: d2cp02364d1.zip [file d2cp02364d1.zip]

**ON THE ORIGIN OF THE INVERTED SINGLET-TRIPLET GAP OF THE 5<sup>TH</sup> GENERATION LIGHT-EMITTING MOLECULES**

This directory contains optimized molecular geometries of molecules **1-6**. The subdirectories (below in **bold**) comprise geometries optimized at the following levels of theory denoted as follows:

**MP2\_ground\_state**

- ground state molecular geometries optimized at the ab initio MP2 level employing the def2-TZVP basis set

**B3LYP\_ground\_state**

- ground state molecular geometries optimized at the DFT level employing the B3LYP functional, D3-BJ dispersion correction, and the def2-TZVPD basis set

**ADC2\_excited\_states**

- excited states molecular geometries optimized at the ab initio ADC(2) level employing the def2-TZVP basis set

- geometries of the first excited singlet state are denoted as \*\_s.xyz, whereas the first excited triplet state geometries are denoted as \*\_t.xyz

**CASPT2\_ground\_state**

- ground state molecular geometries optimized at the XMC-QDPT2 (12 electrons in 9 orbitals) level employing the def2-TZVP basis set.
