# Supplementary material for: On the origin of the inverted singlet–triplet gap of the 5th generation light-emitting molecules
Source: Royal Society of Chemistry journal article supplement (doi:10.1039/d2cp02364d), 2022-01-01
Supplement: d2cp02364d2.pdf [file d2cp02364d2.pdf]

# Journal Name

## ARTICLE TYPE

Cite this: DOI: 00.0000/xxxxxxxxxx

ELECTRONIC SUPPLEMENTARY INFORMATION

### **On the Origin of the Inverted Singlet-Triplet Gap of the 5<sup>th</sup> Generation Light-Emitting Molecules**

Lucie Tučková<sup>a</sup>, Michal Straka<sup>a</sup>, Rashid R. Valiev<sup>b</sup>, and Dage Sundholm<sup>\*b</sup>

**Table S1** Vertical excitation energies (in eV) calculated at the TDDFT level of theory. The molecular structures were optimized at the B3LYP/def2-TZVPD level.

| Molecule →      | 1              |                | 2              |                | 3              |                | 4              |                | 5              |                | 6              |                |
|-----------------|----------------|----------------|----------------|----------------|----------------|----------------|----------------|----------------|----------------|----------------|----------------|----------------|
| Method          | S <sub>1</sub> | T <sub>1</sub> |
| S-VWN           | 1.178          | 1.035          | 2.696          | 2.470          | 1.652          | 1.470          | 1.930          | 1.727          | 2.150          | 1.959          | 2.127          | 1.927          |
| BP86            | -              | -              | 2.666          | 2.478          | 1.680          | 1.456          | 1.961          | 1.710          | 2.184          | 1.950          | 2.160          | 1.918          |
| PBE             | 1.198          | 1.024          | 2.660          | 2.477          | 1.677          | 1.460          | 1.957          | 1.715          | 2.180          | 1.953          | 2.156          | 1.921          |
| TPSS            | 1.226          | 1.040          | 2.735          | 2.540          | 1.722          | 1.488          | 2.011          | 1.747          | 2.241          | 1.996          | 2.216          | 1.961          |
| TPSSH           | 1.247          | 1.040          | 2.863          | 2.644          | 1.777          | 1.512          | 2.087          | 1.784          | 2.333          | 2.052          | 2.306          | 2.012          |
| B3LYP           | 1.234          | 1.034          | 2.902          | 2.684          | 1.778          | 1.517          | 2.098          | 1.796          | 2.352          | 2.071          | 2.324          | 2.028          |
| PBE0            | 1.262          | 1.026          | 3.000          | 2.750          | 1.829          | 1.526          | 2.161          | 1.811          | 2.426          | 2.101          | 2.397          | 2.055          |
| BHLYP           | 1.342          | 1.053          | 3.350          | 3.042          | 1.994          | 1.606          | 2.371          | 1.902          | 2.676          | 2.242          | 2.646          | 2.189          |
| MN15            | 1.221          | 1.069          | 2.984          | 2.812          | 1.798          | 1.580          | 2.142          | 1.875          | 2.409          | 2.165          | 2.374          | 2.118          |
| CAM-B3LYP       | 1.266          | 1.011          | 3.118          | 2.854          | 1.875          | 1.542          | 2.230          | 1.839          | 2.510          | 2.147          | 2.478          | 2.096          |
| tuned-CAM-B3LYP | 1.196          | 1.003          | 2.852          | 2.644          | 1.741          | 1.490          | 2.061          | 1.774          | 2.313          | 2.046          | 2.283          | 2.000          |
| $\omega$ B97X-D | 1.284          | 1.051          | 3.146          | 2.900          | 1.897          | 1.586          | 2.254          | 1.887          | 2.536          | 2.196          | 2.503          | 2.142          |
| LH14t-calPBE    | 1.241          | 1.033          | 2.983          | 2.760          | 1.778          | 1.517          | 2.145          | 1.829          | 2.411          | 2.117          | 2.379          | 2.068          |

**Table S2** Percentage of HOMO-LUMO configuration in the first excited states using different *ab initio* approaches.

| Molecule → | 1              |                | 2              |                | 3              |                | 4              |                | 5              |                | 6              |                |
|------------|----------------|----------------|----------------|----------------|----------------|----------------|----------------|----------------|----------------|----------------|----------------|----------------|
| State      | S <sub>1</sub> | T <sub>1</sub> |
| XMC-CASPT2 | 81             | 93             | 86             | 90             | 86             | 91             | 75             | 85             | 85             | 93             | 85             | 94             |
| CC2        | 97.9           | 98.5           | 96.5           | 98.1           | 94.1           | 97.7           | 90.9           | 96.4           | 89.3           | 95.6           | 91.5           | 97.6           |
| ADC(2)     | 97.8           | 98.4           | 95.8           | 97.7           | 94.1           | 97.6           | 91.0           | 96.3           | 89.4           | 95.6           | 91.5           | 97.5           |

**Table S3** Vertical, adiabatic, and 0–0 excitation energies calculated at the ADC(2) level of theory (in eV). The molecular structures of ground states were optimized at the MP2/def2-TZVP level of theory, whereas excited state geometries were optimized at the ADC(2)/def2-TZVP level of theory.

| Molecule | Vertical       |                | Adiabatic      |                | 0–0            |                |
|----------|----------------|----------------|----------------|----------------|----------------|----------------|
|          | S <sub>1</sub> | T <sub>1</sub> | S <sub>1</sub> | T <sub>1</sub> | S <sub>1</sub> | T <sub>1</sub> |
| 1        | 0.993          | 1.132          | 0.936          | 1.080          | 0.955          | 1.027          |
| 2        | 2.663          | 2.913          | 2.582          | 2.838          | 2.437          | 2.551          |
| 3        | 1.540          | 1.658          | 1.471          | 1.591          | 1.415          | 1.491          |
| 4        | 1.915          | 2.002          | 1.779          | 1.906          | 1.692          | 1.764          |
| 5        | 2.154          | 2.296          | 2.013          | 2.145          | 1.901          | 1.995          |
| 6        | 2.087          | 2.218          | 2.008          | 2.142          | 1.905          | 2.002          |

**Table S4** Vertical excitation energies (in eV) calculated at different levels of theory from literature.

| Molecule → |                              | 1                  |                    |                  | 2                  |                    |                  |
|------------|------------------------------|--------------------|--------------------|------------------|--------------------|--------------------|------------------|
| Ref.       | method                       | E(S <sub>1</sub> ) | E(T <sub>1</sub> ) | ΔE <sub>ST</sub> | E(S <sub>1</sub> ) | E(T <sub>1</sub> ) | ΔE <sub>ST</sub> |
| 1          | SA-CASSCF/def2-TZVP          | 0.826              | 0.936              | -0.110           | -                  | -                  | -                |
| 1          | SC-NEVPT2/def2-TZVP          | 1.107              | 1.259              | -0.152           | -                  | -                  | -                |
| 1          | SCS-CC2/def2-TZVP            | 1.110              | 1.330              | -0.220           | -                  | -                  | -                |
| 2          | CIS/def2-TZVP                | 1.797              | 1.460              | 0.337            | 4.328              | 3.918              | 0.410            |
| 2          | CIS(D)/def2-TZVP             | 1.042              | 1.322              | -0.280           | 2.627              | 3.150              | -0.523           |
| 2          | SCS-CC2/def2-TZVP            | 1.110              | 1.334              | -0.224           | 2.847              | 3.226              | -0.379           |
| 2          | SCS-ADC(2)/def2-TZVP         | 1.080              | 1.308              | -0.228           | 2.790              | 3.174              | -0.384           |
| 3          | CIS/cc-pVDZ                  | 1.83               | 1.50               | 0.33             | -                  | -                  | -                |
| 3          | CIS(D)/cc-pVDZ               | 1.07               | 1.37               | -0.30            | -                  | -                  | -                |
| 3          | ADC(2)/cc-pVDZ               | 1.04               | 1.20               | -0.16            | -                  | -                  | -                |
| 3          | EOM-CCSD/cc-pVDZ             | 1.09               | 1.19               | -0.10            | -                  | -                  | -                |
| 4          | RASSCF/def2-TZVP             | 0.65               | 0.93               | -0.28            | 2.56               | 2.95               | -0.39            |
| 4          | RASPT2/def2-TZVP             | 0.86               | 0.89               | -0.03            | 2.54               | 2.67               | -0.13            |
| 4          | CIS/def2-TZVP                | 1.64               | 1.00               | 0.64             | 4.35               | 3.78               | 0.57             |
| 4          | CIS(D)/def2-TZVP             | 0.91               | 1.12               | -0.21            | 2.49               | 3.10               | -0.61            |
| 4          | B2PLYP/def2-TZVP             | 1.12               | 1.10               | 0.02             | 2.75               | 2.79               | -0.04            |
| 4          | DLPNO-STEOM-CCSD/def2-TZVP   | 0.61               | 1.04               | -0.43            | 2.35               | 3.01               | -0.66            |
| 5          | ADC(3)/cc-pVDZ               | 0.777              | 0.869              | -0.092           | 2.665              | 2.774              | -0.109           |
| 5          | ADC(2)/cc-pVDZ               | 1.038              | 1.198              | -0.160           | 2.578              | 2.856              | -0.278           |
| 5          | EOM-CCSD/cc-pVDZ             | 1.092              | 1.191              | -0.099           | 2.791              | 2.971              | -0.180           |
| 5          | FNO-EOM-CCSD/cc-pVDZ         | 1.126              | 1.230              | -0.104           | 3.418              | 3.632              | -0.214           |
| 5          | DLPNO-NEVPT2(6,6)/def2-SV(P) | 1.112              | 1.301              | -0.189           | 2.552              | 2.896              | -0.344           |
| 5          | ωB2PLYP/def2-SVP             | 1.316              | 1.274              | 0.042            | 3.028              | 3.246              | -0.218           |
| 5          | SA-SF-PBE50/def2-SVP         | 1.095              | 1.204              | -0.109           | 2.909              | 3.090              | -0.181           |
| 6          | ADC(2)/cc-pVDZ               | -                  | -                  | -                | 2.569              | 2.851              | -0.282           |
| 6          | CC2/cc-pVDZ                  | -                  | -                  | -                | 2.676              | 2.947              | -0.271           |
| 6          | EOM-CCSD/cc-pVDZ             | -                  | -                  | -                | 2.781              | 2.963              | -0.182           |
| 6          | CASPT2/cc-pVDZ               | -                  | -                  | -                | 2.326              | 2.551              | -0.225           |
| 7          | DFT/MRCL/TZVP                | -                  | -                  | -                | 2.59               | 2.60               | -0.01            |

**Table S5** Vertical excitation energies calculated at various levels of theory (in eV). The molecular structures of ground states were optimized at the CASPT2(12,9)/def2-TZVP level of theory.

| Molecule | CASSCF (12,9)  |                | CASSCF (14,14) |                | CASPT2 (12,9)  |                | CASPT2 (14,14) |                |
|----------|----------------|----------------|----------------|----------------|----------------|----------------|----------------|----------------|
|          | S <sub>1</sub> | T <sub>1</sub> |
| 1        | 1.154          | 1.317          | 0.632          | 1.005          | 1.165          | 1.313          | 0.958          | 1.064          |
| 2        | 3.199          | 3.425          | 1.560          | 2.202          | 2.265          | 2.283          |                |                |
| 3        | 1.846          | 1.920          | 0.917          | 1.353          | 1.293          | 1.349          |                |                |
| 4        | 2.487          | 2.321          | 1.694          | 1.777          | 1.680          | 1.898          |                |                |
| 5        | 2.775          | 2.515          | 1.421          | 1.834          | 1.872          | 2.526          |                |                |
| 6        | 2.675          | 2.511          | 1.104          | 1.674          | 1.814          | 1.974          |                |                |

**Table S6** The triplet excitation energies (in eV) obtained using the SFDFD approach.

| Molecule →     | 1     | 2     | 3     | 4     | 5     | 6     |
|----------------|-------|-------|-------|-------|-------|-------|
| T <sub>1</sub> | 1.217 | 3.045 | 1.659 | 1.911 | 2.146 | 2.199 |

**Table S7** Spin contamination of the  $\Delta$ SCF calculations using two DFT functionals and the Hartree-Fock level. The molecular structures were optimized at the B3LYP/def2-TZVPD level.

| Molecule | B3LYP          |                | $\omega$ B97X-D |                | HF             |                |
|----------|----------------|----------------|-----------------|----------------|----------------|----------------|
|          | S <sub>1</sub> | T <sub>1</sub> | S <sub>1</sub>  | T <sub>1</sub> | S <sub>1</sub> | T <sub>1</sub> |
| 1        | 1.09           | 2.01           | 1.17            | 2.02           | 2.01           | 2.24           |
| 2        | 1.10           | 2.01           | 1.17            | 2.02           |                |                |
| 3        | 1.09           | 2.01           | 1.16            | 2.02           |                |                |
| 5        | 1.09           | 2.01           | 1.16            | 2.02           |                |                |
| 6        | 1.09           | 2.01           | 1.16            | 2.02           |                |                |

**Table S8** Vertical excitation energies (in eV) calculated with the  $\Delta$ SCF approach employing two DFT functionals. The molecular structures were optimized at the B3LYP/def2-TZVPD level.

| Molecule | B3LYP          |                | $\omega$ B97X-D |                |
|----------|----------------|----------------|-----------------|----------------|
|          | S <sub>1</sub> | T <sub>1</sub> | S <sub>1</sub>  | T <sub>1</sub> |
| 1        | 0.958          | 1.074          | 0.896           | 1.175          |
| 2        | 2.578          | 2.732          | 2.746           | 3.077          |
| 3        | 1.472          | 1.565          | 1.493           | 1.713          |
| 5        | 2.028          | 2.126          | 2.127           | 2.342          |
| 6        | 1.993          | 2.081          | 2.091           | 2.277          |

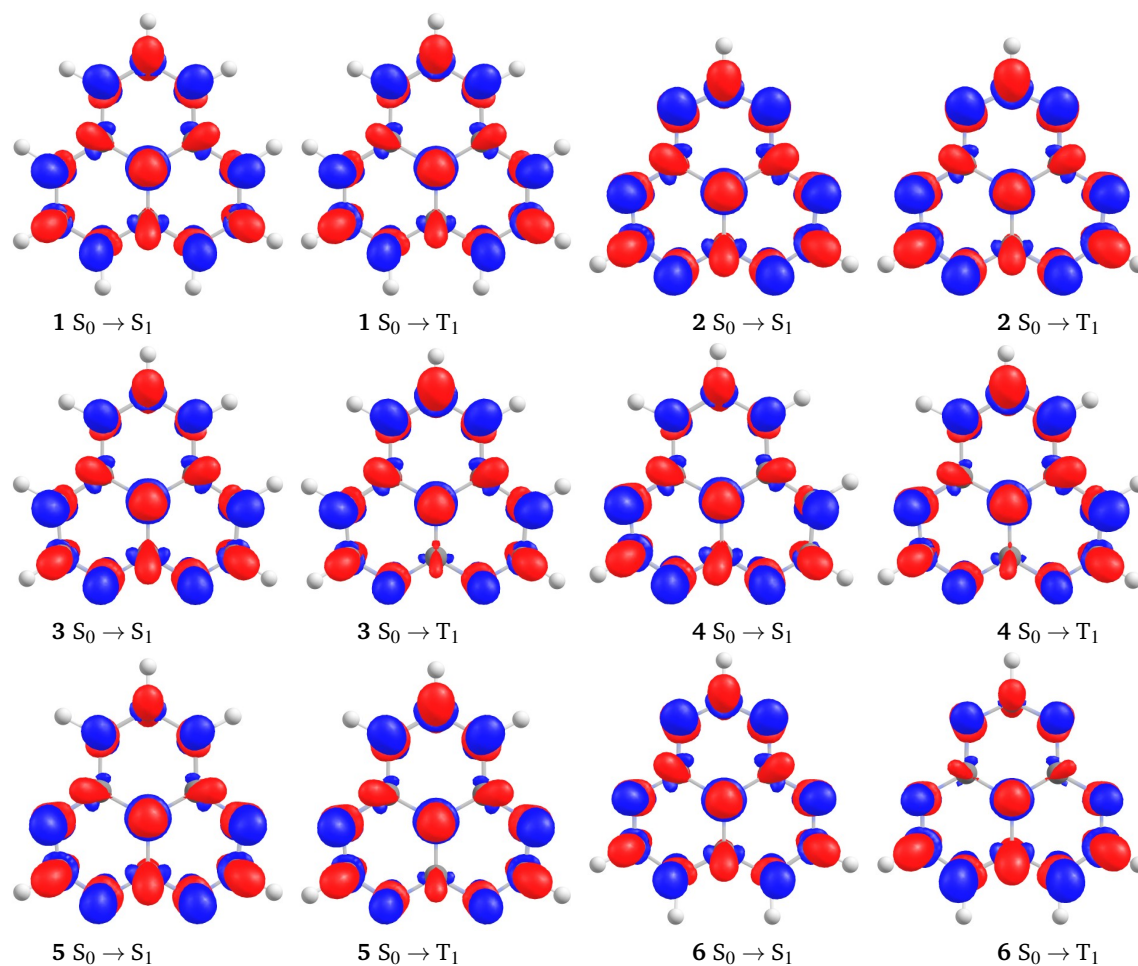

**Fig. S1** Density differences for  $S_0 \rightarrow S_1$  and  $S_0 \rightarrow T_1$  excitations calculated at the DFT B3LYP/def2-TZVPD level of theory. Regions of decreasing density are in blue, red color denotes regions of increasing density (isosurface 0.004).

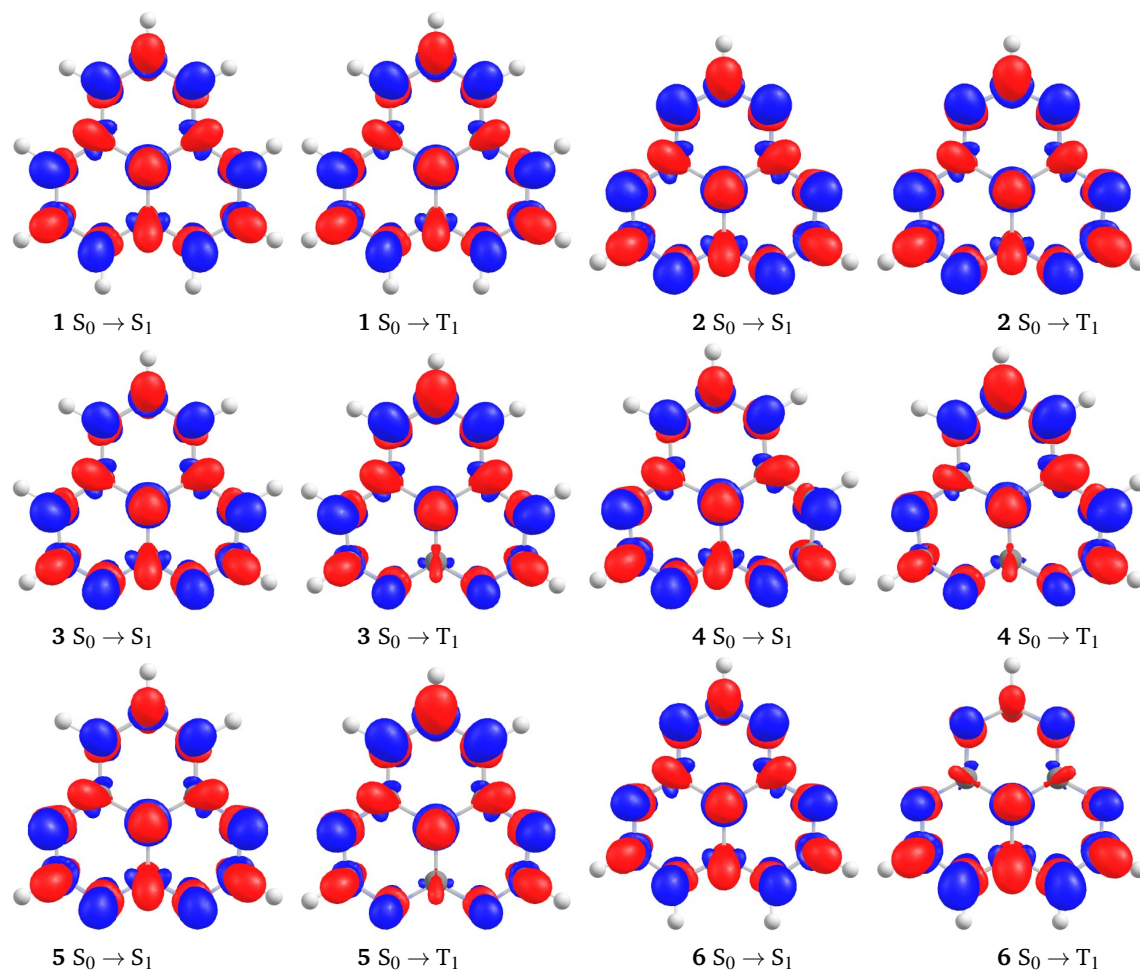

**Fig. S2** Density differences for  $S_0 \rightarrow S_1$  and  $S_0 \rightarrow T_1$  excitations calculated at the DFT  $\omega$ B97X-D/def2-TZVPD level of theory. Regions of decreasing density are in blue, red color denotes regions of increasing density (isosurface 0.004).

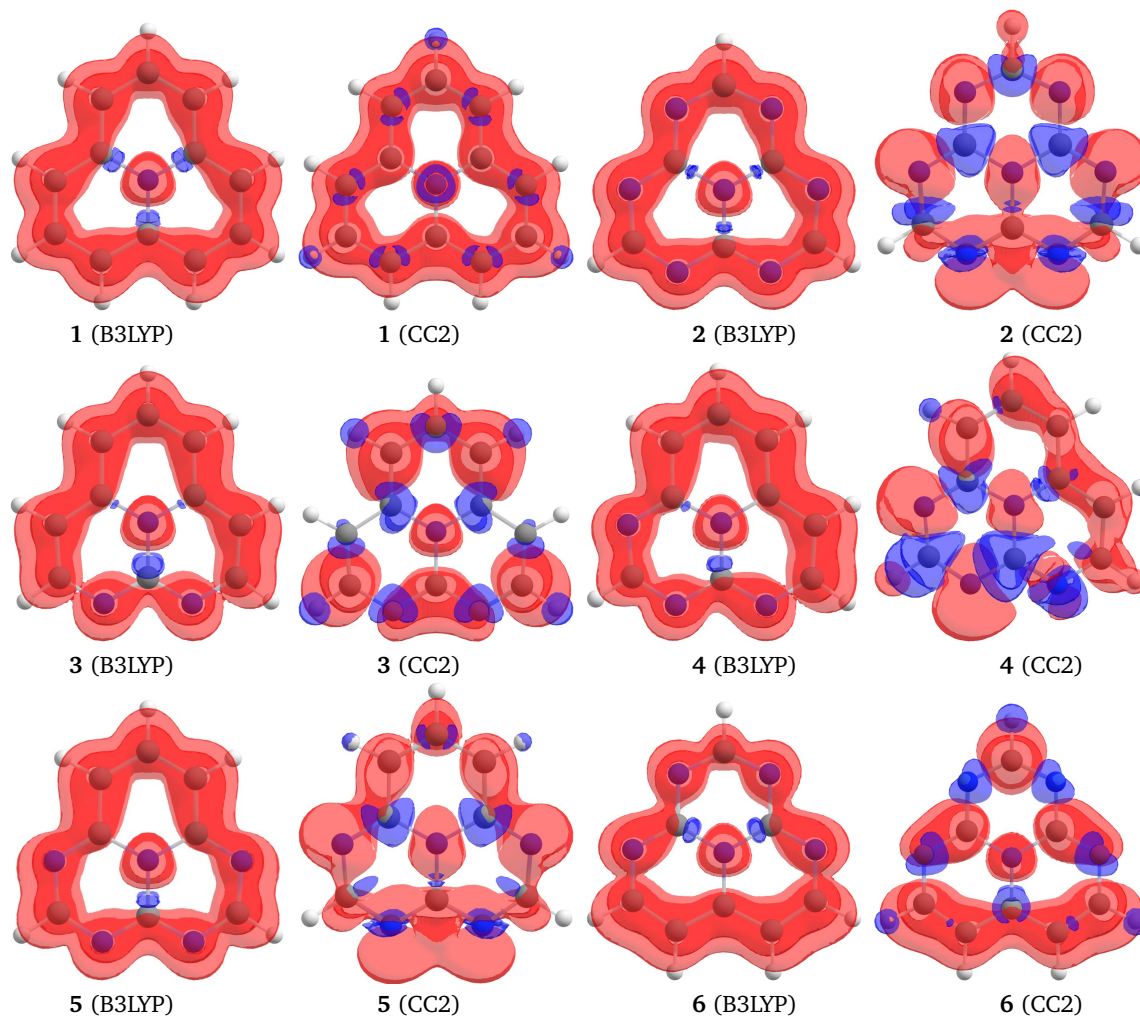

Fig. S3 Spin densities of the lowest  $T_1$  state calculated at the B3LYP/def2-TZVPD and CC2/def2-TZVP levels for molecules 1 to 6.

## Notes and references

- 1 J. Sanz-Rodrigo, G. Ricci, Y. Olivier and J. C. Sancho-García, *J. Phys. Chem. A*, 2021, **125**, 513–522.
- 2 G. Ricci, E. San-Fabián, Y. Olivier and J. C. Sancho-García, *ChemPhysChem*, 2021, **22**, 553–560.
- 3 P. de Silva, *J. Phys. Chem. Lett.*, 2019, **10**, 5674–5679.
- 4 S. Ghosh and K. Bhattacharyya, *J. Phys. Chem. A*, 2022, **126**, 1378–1385.
- 5 R. Pollice, P. Friederich, C. Lavigne, G. dos Passos Gomes and A. Aspuru-Guzik, *Matter*, 2021, **4**, 1654–1682.
- 6 J. Ehrmaier, E. J. Rabe, S. R. Pristash, K. L. Corp, C. W. Schlenker, A. L. Sobolewski and W. Domcke, *J. Phys. Chem. A*, 2019, **123**, 8099–8108.
- 7 F. Dinkelbach, M. Bracker, M. Kleinschmidt and C. M. Marian, *J. Phys. Chem. A*, 2021, **125**, 10044–10051.
